# Supplementary material for: A Need for Cognition Scale for Children and Adolescents
Source: Atypon-hosted journal article supplement (doi:10.1027/1015-5759/a000370), 2016-11-08
Supplement: 1015-5759_a000370_esm1.pdf [file 1015-5759_a000370_esm1.pdf]

## Items of the NFC scale

Table A1

NFC items in German and Finnish

| Item no. | German [Variation used in Luxembourg]                                                                                                                 | Finnish                                                                                            |
|----------|-------------------------------------------------------------------------------------------------------------------------------------------------------|----------------------------------------------------------------------------------------------------|
| 1        | Ich denke mir gerne Lösungen für Probleme aus.                                                                                                        | Mielestäni on mukavaa miettiä ongelmiin ratkaisuja.                                                |
| 2        | Nachdenken macht mir Spaß.                                                                                                                            | Ajattelemisen on minusta hauskaa.                                                                  |
| 3        | Wenn ich etwas nicht verstehe, dann denke ich solange nach, bis ich es verstanden habe.                                                               | Jos en ymmärrä jotain asiaa, mietin sitä niin kauan, kunnes ymmärrän sen.                          |
| 4        | Ich löse gerne knifflige Aufgaben. [Ich löse gerne Aufgaben, bei denen man richtig nachdenken muss.]                                                  | Ratkaisen mielelläni hankalia tehtäviä.                                                            |
| 5        | In der Schule möchte ich alles ganz genau verstehen.                                                                                                  | Haluan ymmärtää koulussa opittavat asiat kunnolla.                                                 |
| 6        | Ich mag es, wenn ich für eine Hausaufgabe richtig meinen Kopf anstrengen muss.                                                                        | Pidän siitä, että joudun kotitehtäviä tehdessäni todella käyttämään aivojani.                      |
| 7        | Ich löse gerne Rätsel.                                                                                                                                | Ratkaisen mielelläni arvoituksia.                                                                  |
| 8        | Ich möchte immer alles ganz genau wissen.                                                                                                             | Haluan aina ymmärtää asiat perusteellisesti.                                                       |
| 9        | Ich mache gerne Aufgaben, bei denen ich viel nachdenken muss.                                                                                         | Teen mielelläni tehtäviä, joissa joudun ajattelemaan tosissani.                                    |
| 10       | Ich lerne gerne Neues.                                                                                                                                | Pidän uusien asioiden oppimisesta.                                                                 |
| 11       | Ich mag Situationen, in denen ich richtig nachdenken muss.                                                                                            | Pidän tilanteista, joissa joudun ajattelemaan tosissani.                                           |
| 12       | Wenn ich in der Schule Knobelaufgaben bekomme, dann freue ich mich.<br>[Wenn ich in der Schule Aufgaben zum Nachdenken bekomme, dann freue ich mich.] | Minusta on hauskaa saada koulussa hankalia tehtäviä.                                               |
| 13       | Ich mag Situationen, in denen ich mit viel Nachdenken etwas erreichen kann.                                                                           | Pidän tilanteista, joissa perusteellisesta ajattelemisesta on hyötyä jonkin Asian saavuttamiseksi. |
| 14       | Ich denke sehr gerne nach.                                                                                                                            | Nautin ajattelemisesta.                                                                            |

### Item statistics

Tables B1, B2, and B3 show item statistics for the German, Luxembourgish and Finnish sample. Mean and standard deviation are expressed as POMP scores (Cohen et al., 1999).

Table B1

*Item statistics (POMP scores) for the 14 NFC items in the German sample.*

| Item no. | M     | SD    | $r_{it}$ | Kurtosis | Skewness |
|----------|-------|-------|----------|----------|----------|
| Grade 1  |       |       |          |          |          |
| 1        | 75.00 | 33.00 | .43      | -0.23    | -0.98    |
| 2        | 67.00 | 37.50 | .53      | -0.97    | -0.64    |
| 3        | 65.00 | 38.50 | .56      | -1.12    | -0.58    |
| 4        | 71.50 | 38.00 | .59      | -0.70    | -0.90    |
| 5        | 89.00 | 26.00 | .48      | 4.12     | -2.25    |
| 6        | 65.50 | 40.50 | .64      | -1.21    | -0.62    |
| 7        | 81.00 | 33.00 | .53      | 0.89     | -1.51    |
| 8        | 85.00 | 28.50 | .49      | 2.09     | -1.78    |
| 9        | 63.50 | 40.00 | .70      | -1.26    | -0.51    |
| 10       | 90.00 | 25.00 | .46      | 5.41     | -2.52    |
| 11       | 61.00 | 39.50 | .65      | -1.29    | -0.42    |
| 12       | 70.00 | 39.00 | .64      | -0.88    | -0.82    |
| 13       | 79.00 | 32.00 | .62      | 0.35     | -1.23    |
| 14       | 79.00 | 32.00 | .63      | 0.36     | -1.25    |
| Grade 2  |       |       |          |          |          |
| 1        | 74.50 | 32.50 | .44      | -0.29    | -0.91    |
| 2        | 70.50 | 34.00 | .51      | -0.62    | -0.72    |
| 3        | 69.50 | 36.00 | .49      | -0.74    | -0.74    |
| 4        | 74.00 | 37.00 | .53      | -0.42    | -1.03    |
| 5        | 91.00 | 22.50 | .36      | 5.92     | -2.56    |
| 6        | 51.50 | 39.50 | .62      | -1.41    | -0.06    |
| 7        | 88.00 | 27.00 | .43      | 3.56     | -2.14    |
| 8        | 87.00 | 25.00 | .36      | 2.15     | -1.74    |
| 9        | 60.00 | 37.00 | .68      | -1.13    | -0.34    |
| 10       | 91.50 | 22.00 | .39      | 6.30     | -2.61    |
| 11       | 56.00 | 38.00 | .66      | -1.27    | -0.21    |
| 12       | 65.50 | 38.00 | .59      | -1.05    | -0.59    |
| 13       | 80.50 | 30.50 | .54      | 0.59     | -1.30    |
| 14       | 75.00 | 33.50 | .62      | -0.26    | -0.96    |
| Grade 3  |       |       |          |          |          |
| 1        | 70.00 | 32.50 | .37      | -0.63    | -0.63    |
| 2        | 60.50 | 37.00 | .66      | -1.10    | -0.34    |
| 3        | 65.50 | 34.00 | .41      | -0.82    | -0.48    |
| 4        | 63.50 | 37.50 | .64      | -1.11    | -0.48    |
| 5        | 89.00 | 24.00 | .46      | 3.97     | -2.17    |
| 6        | 47.50 | 36.50 | .58      | -1.11    | 0.08     |
| 7        | 84.50 | 28.50 | .48      | 1.81     | -1.69    |

|         |       |       |     |       |       |
|---------|-------|-------|-----|-------|-------|
| 8       | 76.00 | 30.50 | .44 | -0.27 | -0.86 |
| 9       | 50.50 | 36.50 | .75 | -1.11 | -0.02 |
| 10      | 89.00 | 22.50 | .48 | 2.90  | -1.93 |
| 11      | 53.00 | 35.50 | .62 | -1.02 | -0.08 |
| 12      | 58.50 | 36.50 | .61 | -1.11 | -0.27 |
| 13      | 74.50 | 31.50 | .60 | -0.33 | -0.85 |
| 14      | 66.00 | 35.00 | .67 | -0.87 | -0.54 |
| Grade 4 |       |       |     |       |       |
| 1       | 70.00 | 29.00 | .37 | -0.72 | -0.38 |
| 2       | 60.00 | 32.00 | .67 | -0.66 | -0.21 |
| 3       | 68.00 | 32.00 | .40 | -0.68 | -0.49 |
| 4       | 65.00 | 36.50 | .62 | -0.97 | -0.53 |
| 5       | 85.00 | 25.50 | .47 | 1.09  | -1.43 |
| 6       | 45.00 | 35.00 | .63 | -0.95 | 0.14  |
| 7       | 86.00 | 27.00 | .55 | 2.11  | -1.75 |
| 8       | 75.50 | 29.00 | .42 | -0.46 | -0.73 |
| 9       | 52.50 | 33.50 | .72 | -0.76 | -0.05 |
| 10      | 88.00 | 24.00 | .52 | 2.51  | -1.83 |
| 11      | 53.00 | 33.00 | .68 | -0.69 | -0.06 |
| 12      | 57.00 | 36.50 | .64 | -1.10 | -0.22 |
| 13      | 76.50 | 30.50 | .59 | -0.15 | -0.94 |
| 14      | 65.00 | 31.50 | .65 | -0.69 | -0.34 |

Table B2

Item statistics (POMP scores) for the 14 NFC items in the Finnish sample.

| Item no. | M     | SD    | $r_{it}$ | Kurtosis | Skewness |
|----------|-------|-------|----------|----------|----------|
| Grade 3  |       |       |          |          |          |
| 1        | 62.50 | 33.33 | .78      | -0.85    | -0.53    |
| 2        | 62.50 | 32.00 | .76      | -0.84    | -0.48    |
| 3        | 64.67 | 30.67 | .66      | -0.62    | -0.59    |
| 4        | 57.67 | 34.00 | .78      | -1.08    | -0.33    |
| 5        | 81.67 | 25.50 | .65      | 1.71     | -1.51    |
| 6        | 59.83 | 33.67 | .74      | -0.98    | -0.45    |
| 7        | 72.00 | 30.67 | .76      | -0.21    | -0.90    |
| 8        | 78.83 | 26.33 | .68      | 1.01     | -1.28    |
| 9        | 61.17 | 31.50 | .84      | -0.80    | -0.46    |
| 10       | 76.50 | 26.67 | .74      | 0.52     | -1.10    |
| 11       | 61.00 | 31.50 | .82      | -0.80    | -0.45    |
| 12       | 56.67 | 33.83 | .80      | -1.09    | -0.32    |
| 13       | 69.00 | 29.50 | .76      | -0.24    | -0.77    |
| 14       | 62.83 | 32.00 | .76      | -0.75    | -0.54    |
| Grade 6  |       |       |          |          |          |
| 1        | 44.17 | 29.50 | .76      | -0.92    | 0.03     |

|         |       |       |     |       |       |
|---------|-------|-------|-----|-------|-------|
| 2       | 51.50 | 28.50 | .75 | -0.73 | -0.18 |
| 3       | 50.50 | 28.33 | .73 | -0.79 | -0.13 |
| 4       | 40.33 | 29.17 | .78 | -0.90 | 0.23  |
| 5       | 69.67 | 26.50 | .69 | 0.34  | -0.91 |
| 6       | 39.33 | 29.67 | .75 | -0.90 | 0.26  |
| 7       | 54.50 | 30.83 | .79 | -0.91 | -0.27 |
| 8       | 68.17 | 26.00 | .73 | 0.15  | -0.76 |
| 9       | 44.17 | 27.83 | .86 | -0.76 | 0.09  |
| 10      | 64.50 | 26.00 | .78 | -0.16 | -0.58 |
| 11      | 46.67 | 27.67 | .85 | -0.72 | 0.02  |
| 12      | 41.33 | 29.00 | .82 | -0.87 | 0.19  |
| 13      | 55.50 | 29.67 | .78 | -0.81 | -0.27 |
| 14      | 52.83 | 28.67 | .81 | -0.74 | -0.19 |
| Grade 9 |       |       |     |       |       |
| 1       | 40.50 | 30.00 | .77 | -0.99 | 0.13  |
| 2       | 52.17 | 28.50 | .75 | -0.68 | -0.25 |
| 3       | 47.17 | 28.33 | .77 | -0.81 | -0.11 |
| 4       | 38.17 | 29.50 | .80 | -0.89 | 0.30  |
| 5       | 63.83 | 27.67 | .68 | -0.07 | -0.71 |
| 6       | 34.67 | 28.33 | .74 | -0.75 | 0.40  |
| 7       | 48.50 | 31.00 | .80 | -1.02 | -0.14 |
| 8       | 64.50 | 27.17 | .70 | -0.04 | -0.70 |
| 9       | 42.17 | 27.00 | .84 | -0.68 | 0.10  |
| 10      | 62.67 | 26.00 | .74 | 0.02  | -0.62 |
| 11      | 46.17 | 27.17 | .85 | -0.67 | -0.05 |
| 12      | 38.17 | 27.67 | .78 | -0.79 | 0.23  |
| 13      | 51.67 | 30.17 | .78 | -0.88 | -0.18 |
| 14      | 52.33 | 29.17 | .77 | -0.75 | -0.23 |

Table B3

Item statistics (POMP scores) for the 14 NFC items in the Luxembourgish sample.

| Item no. | M     | SD    | $r_{it}$ | Kurtosis | Skewness |
|----------|-------|-------|----------|----------|----------|
| Grade 7  |       |       |          |          |          |
| 1        | 68.67 | 30.00 | .53      | -0.34    | -0.69    |
| 2        | 56.33 | 30.33 | .69      | -0.79    | -0.19    |
| 3        | 67.33 | 29.00 | .50      | -0.47    | -0.54    |
| 4        | 52.33 | 33.33 | .74      | -1.08    | 0.01     |
| 5        | 82.67 | 23.00 | .50      | 1.44     | -1.28    |
| 6        | 40.67 | 31.33 | .68      | -0.74    | 0.36     |
| 7        | 66.33 | 34.00 | .61      | -0.78    | -0.63    |
| 8        | 74.67 | 27.67 | .54      | -0.04    | -0.84    |
| 9        | 44.00 | 31.33 | .79      | -0.82    | 0.26     |
| 10       | 79.33 | 26.00 | .60      | 1.00     | -1.20    |
| 11       | 48.00 | 31.67 | .78      | -0.89    | 0.12     |
| 12       | 43.67 | 30.00 | .78      | -0.70    | 0.22     |
| 13       | 62.00 | 31.67 | .72      | -0.81    | -0.39    |
| 14       | 59.67 | 31.67 | .74      | -0.87    | -0.30    |
| Grade 9  |       |       |          |          |          |
| 1        | 63.33 | 29.67 | .60      | -0.41    | -0.54    |
| 2        | 51.67 | 29.67 | .73      | -0.75    | -0.02    |
| 3        | 60.67 | 28.67 | .62      | -0.48    | -0.37    |
| 4        | 43.67 | 31.33 | .75      | -0.80    | 0.27     |
| 5        | 69.33 | 26.67 | .56      | 0.10     | -0.68    |
| 6        | 31.33 | 28.33 | .66      | -0.09    | 0.69     |
| 7        | 51.67 | 33.67 | .67      | -1.08    | -0.10    |
| 8        | 64.00 | 29.67 | .63      | -0.56    | -0.46    |
| 9        | 36.67 | 29.33 | .77      | -0.38    | 0.51     |
| 10       | 69.33 | 27.67 | .65      | 0.16     | -0.76    |
| 11       | 41.33 | 30.00 | .80      | -0.69    | 0.30     |
| 12       | 34.33 | 28.00 | .74      | -0.30    | 0.52     |
| 13       | 50.67 | 32.33 | .78      | -0.97    | -0.06    |
| 14       | 53.33 | 31.67 | .77      | -0.91    | -0.10    |

## Group factor means for full and partial invariance models

Table C1

*Group factor means [and 95% confidence intervals] for the nested factor NFC model in the German, Finnish and Luxembourgish samples.*

| Grade level          | Factor  | Full invariance model | Partial invariance model |
|----------------------|---------|-----------------------|--------------------------|
| German sample        |         |                       |                          |
| 2                    | Think   | -.31<br>[-.49 - -.13] | -.22<br>[-.39 - -.05]    |
|                      | Seek    | .27<br>[-.10 - .63]   | .14<br>[-.20 - .49]      |
|                      | Conquer | .63<br>[-.10 - 1.37]  | .48<br>[-.18 - 1.14]     |
| 3                    | Think   | -.54<br>[-.70 - -.38] | -.51<br>[-.67 - -.35]    |
|                      | Seek    | -.01<br>[-.25 - .23]  | -.03<br>[-.28 - .21]     |
|                      | Conquer | -.19<br>[-.55 - .16]  | -.22<br>[-.58 - .13]     |
| 4                    | Think   | -.55<br>[-.71 - -.40] | -.52<br>[-.68 - -.36]    |
|                      | Seek    | -.02<br>[-.25 - .20]  | -.06<br>[-.29 - .18]     |
|                      | Conquer | -.36<br>[-.66 - -.06] | -.37<br>[-.68 - -.07]    |
| Finnish sample       |         |                       |                          |
| 6                    | Think   | -.62<br>[-.73 - -.51] | -.54<br>[-.65 - -.44]    |
|                      | Seek    | -.20<br>[-.34 - -.05] | -.32<br>[-.47 - -.16]    |
|                      | Conquer | -.07<br>[-.21 - .06]  | -.20<br>[-.33 - -.06]    |
| 9                    | Think   | -.73<br>[-.86 - -.61] | -.59<br>[-.71 - -.47]    |
|                      | Seek    | -.15<br>[-.37 - .06]  | -.39<br>[-.59 - -.19]    |
|                      | Conquer | -.21<br>[-.37 - -.04] | -.43<br>[-.60 - -.27]    |
| Luxembourgish sample |         |                       |                          |
| 9                    | Think   | -.33<br>[-.40 - -.27] | -.22<br>[-.29 - -.16]    |
|                      | Seek    | -.20<br>[-.28 - -.12] | -.32<br>[-.41 - -.24]    |
|                      | Conquer | -.58<br>[-.65 - -.51] | -.63<br>[-.70 - -.56]    |
